# Supplementary material for: Interaction of starch branching enzyme 3 and granule-bound starch synthase 1 alleles increases amylose content and alters physico-chemical properties in japonica rice (Oryza sativa L.)
Source: Front Plant Sci. 2022 Aug 5;13:968795. doi: 10.3389/fpls.2022.968795 (PMC9389286; doi:10.3389/fpls.2022.968795)
Supplement: Supplementary file 1 [file Data_Sheet_1.xlsx]

## Sheet: TableS1
Supplementary Table 1. List of primers used in this study
Primer	Forward sequence (5'-3')	Reverse sequence (5'-3')	Gene ID	Reference	Note
SBE3	ATGCTAGAGTTTGACCGC	AGTGTGATGGATCCTGCC	Os02g0528200	Baysal et al. 2020	qRT-PCR
GBSS1	AACGTGGCTGCTCCTTGAA	TTGGCAATAAGCCACACACA	Os06g0133000	Baysal et al. 2020
GBSS2	AGGCATCGAGGGTGAGGAG	CCATCTGGCCCACATCTCTA	Os07g0412100	Baysal et al. 2020
SSI	GGGCCTTCATGGATCAACC	CCGCTTCAAGCATCCTCATC	Os06g0160700	Baysal et al. 2020
SSIIa	CCTATTCCTGCGGTAGAAGA	CCGAATCGTCATCCTGGT	Os06g0229800	Zhou et al. 2016
SSIIb	GTAGGAGCAACGGTGGAAGTG	GGTAATTCAGCGTGAACGTGAGT	Os02g0744700	Zhou et al. 2016
SSIIc	GACCGAAATGCCTTTTTCTCG	GGGCTTGGAGCCTCTCCTTA	Os10g0437600	Baysal et al. 2020
SSIIIa	GCCTGCCCTGGACTACATTG	GCAAACATATGTACACGGTTCTGG	Os08g0191433	Baysal et al. 2020
SSIIIb	ATTCCGCTCGCAAGAACTGA	CAACCGCAGGATAACGGAAA	Os04g0624600	Baysal et al. 2020
SSIVa	GGGAGCGGCTCAAACATAAA	CCGTGCACTGACTGCAAAAT	Os01g0720600	Zhou et al. 2016
SSIVb	ATGCAGGAAGCCGAGATGTT	ACGACAATGGGTGCCAAGAT	Os05g0533600	Zhou et al. 2016
SBE1	TGGCCATGGAAGAGTTGGC	CAGAAGCAACTGCTCCACC	Os06g0726400	Baysal et al. 2020
SBE4	TGATGAACCAACTGTGGAGGATA	CACTGTATCGGTAGTCAAGATGGTT	Os04g0409200	Zeng et al. 2007
PUL	ACCTTTCTTCCATGCTGG	CAAAGGTCTGAAAGATGGG	Os04g0164900	Baysal et al. 2020
PHOL	TTGGCAGGAAGGTTTCGCT	CGAAGCCTGAAGTGAACTTGCT	Os03g0758100	Baysal et al. 2020
PHOH	CACCAAGACGAAGCTCATCAAG	TTCACTCGTTGCTGGGTTCTC	Os01g0851700	Baysal et al. 2020
ISA1	TGCTCAGCTACTCCTCCATCATC	AGGACCGCACAACTTCAACATA	Os08g0520900	Baysal et al. 2020
ISA2	TAGAGGTCCTCTTGGAGG	AATCAGCTTCTGAGTCACCG	Os05g0393700	Baysal et al. 2020
ISA3	ACAGCTTGAGACACTGGGTTGAG	GCATCAAGAGGACAACCATCTG	Os09g0469400	Baysal et al. 2020
AGPS1	GTGCCACTTAAAGGCACCATT	CCCACATTTCAGACACGGTTT	Os09g0298200	Baysal et al. 2020
AGPS2a	ACTCCAAGAGCTCGCAGACC	GCCTGTAGTTGGCACCCAGA	Os08g0345800	Baysal et al. 2020
AGPS2b	AACAATCGAAGCGCGAGAAA	GCCTGTAGTTGGCACCCAGA	Os08g0345800	Baysal et al. 2020
AGPL1	GACAGTTCAGGCCGTGTAATTCA	GGTATCCACTTTCATTGCTTCCA	Os05g0580000	Zeng et al. 2007
AGPL2	AGTTGGATTCAAGACGGATAGC	CGACTTCCTCAGGCAGCTTATT	Os01g0633100	Zeng et al. 2007
AGPL3	AAGCCAGCCATGACCATTTG	CACACGGTAGATTCACGAGACAA	Os03g0735000	Baysal et al. 2020
AGPL4	TCAACGTCGATGCAGCAAAT	ATCCCTCAGTTCCTAGCCTCATT	Os07g0243200	Baysal et al. 2020
UBQ5	GAAGTAAGGAAGGAGGAGGA	AAGGTGTTCAGTTCCAAGG	Os01g0328400	Jeon et al. 2021
CS02_001	ATGTGCTGGATTTGGTCATA	GTGTAGACTGCAGAAAGCCTA		Adeva et al. 2020	Selection
CS06_001	GCTTCACTTCTCTGCTTGTG	TTTCCAGCCCAACACCTTAC		Adeva et al. 2020

## Sheet: TableS2
Supplenmentary Table 2. Amylopectin chain length distribution in different fractions of debranched starches from parental lines and four NILs
	Average chain length	Distribution (%)
		DP 6-12	DP 13-24	DP 25-36	DP ≥ 37
		(A chains)	(B1 chains)	(B2 chains)	(B3 chains)
Dodamssal	27.5 ± 0.1 a	14.8 ± 0.1 b	44.8 ± 0.3 a	14.5 ± 0.0 a	25.9 ± 0.1 a
Hwayeong	21.9 ± 0.0 b	26.6 ± 0.0 a	45.6 ± 0.2 a	12.1 ± 0.1 b	15.7 ± 0.1 b
NIL 1	21.6 ± 0.0 b	27.2 ± 0.0 a	45.5 ± 0.2 a	12.0 ± 0.0 b	15.3 ± 0.1 b
NIL 2	21.6 ± 0.1 b	28.0 ± 0.4 a	44.7 ± 0.2 a	12.2 ± 0.0 b	15.2 ± 0.1 b
NIL 3	27.4 ± 0.1 a	13.4 ± 0.0 b	45.8 ± 0.2 a	15.3 ± 0.1 a	25.5 ± 0.2 a
NIL 4	26.4 ± 0.1 a	14.9 ± 0.0 b	46.4 ± 0.1 a	14.6 ± 0.2 a	24.1 ± 0.2 a
Data are represented as mean ± standard deviation.
Mean values that do not share the same letters are significantly different at P = 0.05 based on Tukey’s test.
DP: degree of polymerization.

## Sheet: TableS3
Supplementary Table 3. Regression analysis of amylose content
Source	DF	Adj SS	Adj MS	F-Value	P-Value
Regression	3	2461.11	820.369	515.54	0.000
SBE3	1	133.7	133.705	84.02	0.000
GBSS1	1	257.91	257.91	162.08	0.000
SBE3*GBSS1	1	116.9	116.903	73.46	0.000
Error	38	60.47	1.591
Total	41	2521.58

## Sheet: TableS4
Supplementary Table 4. Regression analysis of resistant starch content
Source	DF	Adj SS	Adj MS	F-Value	P-Value
Regression	3	771.176	257.059	405.85	0.000
SBE3	1	523.505	523.505	826.52	0.000
GBSS1	1	0.21	0.21	0.33	0.569
SBE3*GBSS1	1	30.114	30.114	47.54	0.000
Error	32	20.268	0.633
Total	35	791.444
